# Supplementary material for: Psilocybin for End-of-Life Anxiety Symptoms: A Systematic Review and Meta-Analysis
Source: PubMed Central journal article supplement — Psychiatry Investig. 2021 Oct 8;18(10):958–67. doi: 10.30773/pi.2021.0209 (PMC8542741; doi:10.30773/pi.2021.0209), 2021-10-08
Supplement: pi-2021-0209-suppl3.pdf [file pi-2021-0209-suppl3.pdf]

|                | Random sequence generation (selection bias) | Allocation concealment (selection bias) | Blinding of participants and personnel (performance bias) | Blinding of outcome assessment (detection bias) | Incomplete outcome data (attrition bias) | Selective reporting (reporting bias) | Other bias |
|----------------|---------------------------------------------|-----------------------------------------|-----------------------------------------------------------|-------------------------------------------------|------------------------------------------|--------------------------------------|------------|
| Griffiths 2016 | ?                                           | ?                                       | +                                                         | +                                               | +                                        | +                                    | +          |
| Grob 2011      | ?                                           | ?                                       | +                                                         | -                                               | +                                        | +                                    | +          |
| Ross 2016      | +                                           | +                                       | +                                                         | -                                               | +                                        | +                                    | +          |

**A**

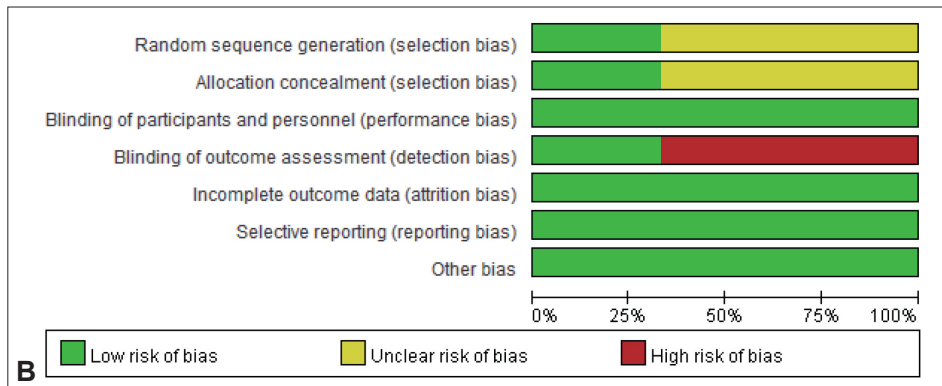

**Supplementary Figure 2.** Risk of bias for included randomized controlled trials. A: Risk of bias summary. B: Risk of bias graph.
