# Supplementary material for: Psilocybin for End-of-Life Anxiety Symptoms: A Systematic Review and Meta-Analysis
Source: PubMed Central journal article supplement — Psychiatry Investig. 2021 Oct 8;18(10):958–67. doi: 10.30773/pi.2021.0209 (PMC8542741; doi:10.30773/pi.2021.0209), 2021-10-08
Supplement: pi-2021-0209-suppl6.pdf [file pi-2021-0209-suppl6.pdf]

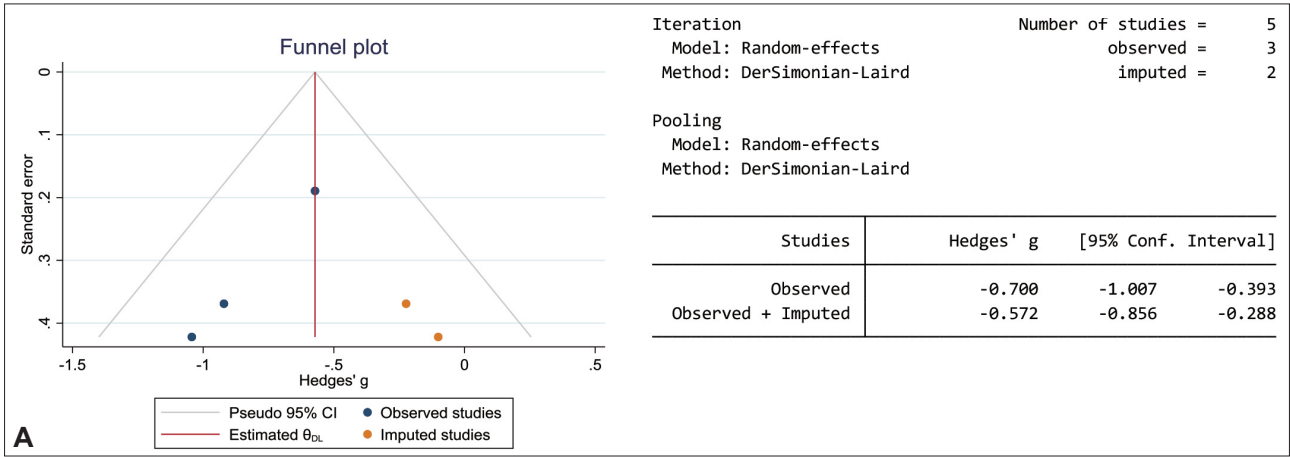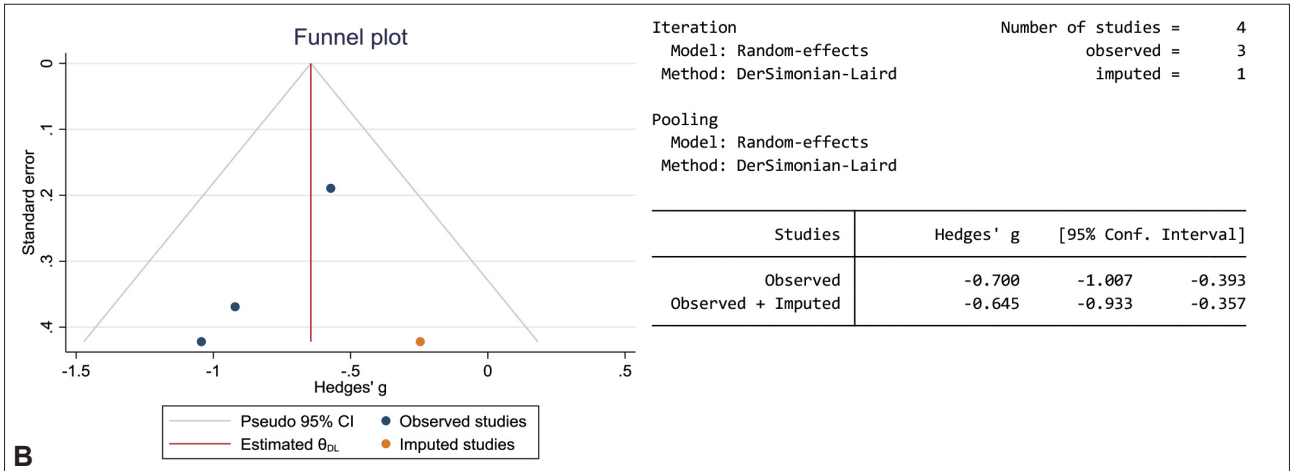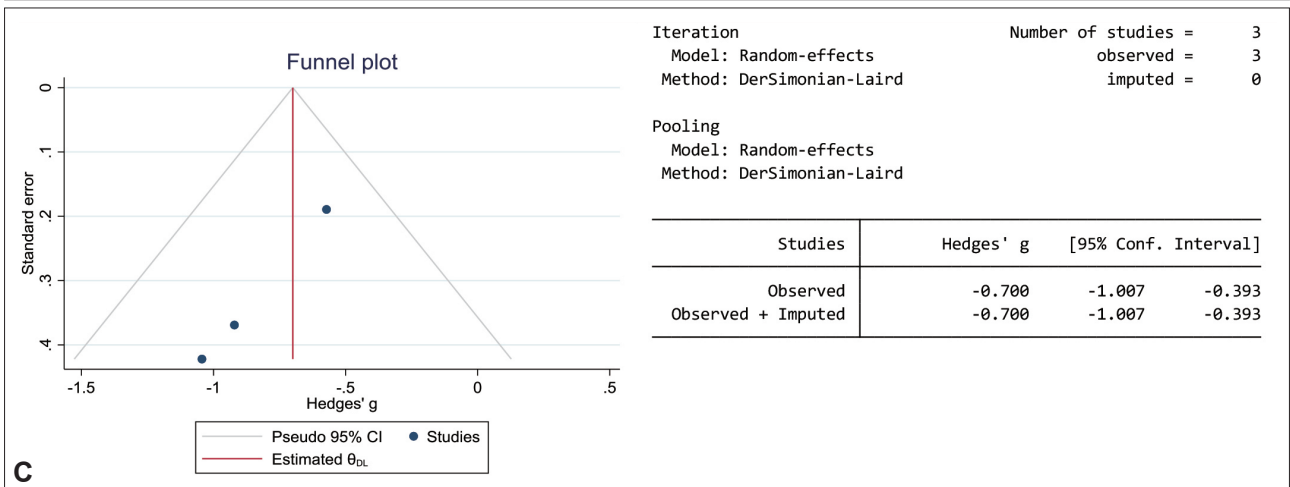

**Supplementary Figure 5.** Publication bias for state anxiety: 1 day after psilocybin treatment. A: Linear estimator. B: Run estimator. C: Quadratic estimator.
